# Supplementary material
Source: HighWire-hosted journal article supplement (https://cmaj.ca/highwire/filestream/57757/field_highwire_adjunct_files/1/acute-holroyd-2-at.pdf)
Supplement: acute-holroyd-2-at.pdf [file acute-holroyd-2-at.pdf]

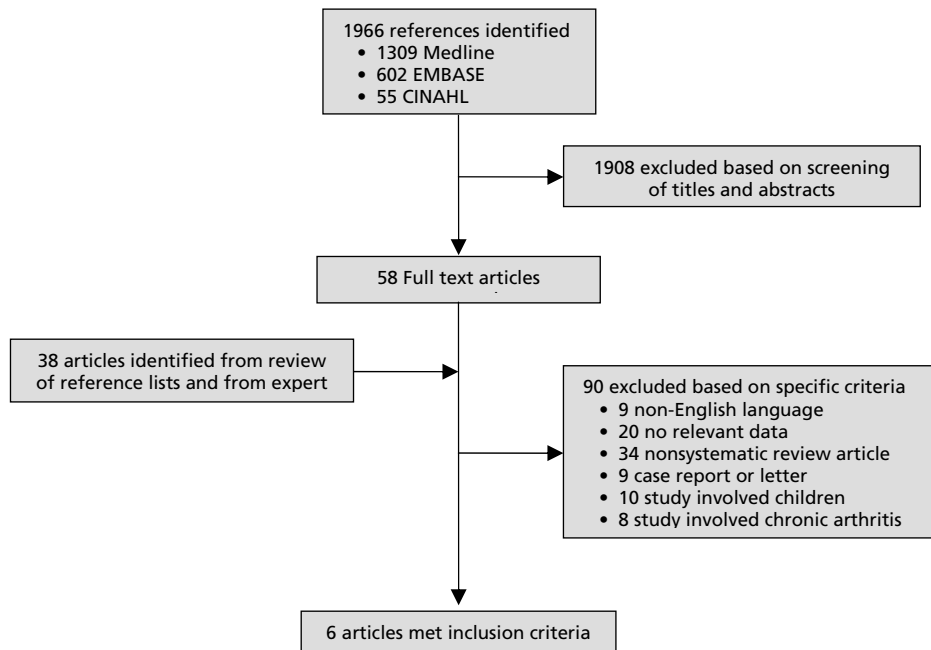

**Appendix 2** (as supplied by the authors): Study Flow. CINAHL = Cumulative Index to Nursing and Allied Health Literature
